# Supplementary material for: Interfacial Properties of H2O+CO2+Oil Three-Phase Systems: A Density Gradient Theory Study
Source: MDPI journal article supplement (doi:10.3390/atmos13040625), 2022-04-14
Supplement: s1 [file s1]

# Supporting Information for “Interfacial Properties of H<sub>2</sub>O+CO<sub>2</sub>+Oil Three-Phase Systems: A Density Gradient Theory Study”

Yafan Yang<sup>1,3\*</sup>, Weiwei Zhu<sup>4</sup>, Yukun Ji<sup>1,3</sup>, Tao Wang<sup>2,3</sup>, and Guangsi Zhao<sup>1,3†</sup>

<sup>1</sup>State Key Laboratory for Geomechanics  
and Deep Underground Engineering,  
China University of Mining and Technology,  
Xuzhou 221116, Jiangsu, China.

<sup>2</sup> State Key Laboratory of Coal Mining and Clean Utilization,  
China Coal Research Institute, Beijing 100013, China

<sup>3</sup> School of Mechanics and Civil Engineering,  
China University of Mining and Technology,  
Xuzhou 221116, Jiangsu, China.

<sup>4</sup> Department of Engineering Mechanics,  
Tsinghua University 100084, Beijing, China.

April 8, 2022

---

\*To whom correspondence should be addressed, email: yafan.yang@cumt.edu.cn

†To whom correspondence should be addressed, email: zhaoguangsi@cumt.edu.cn

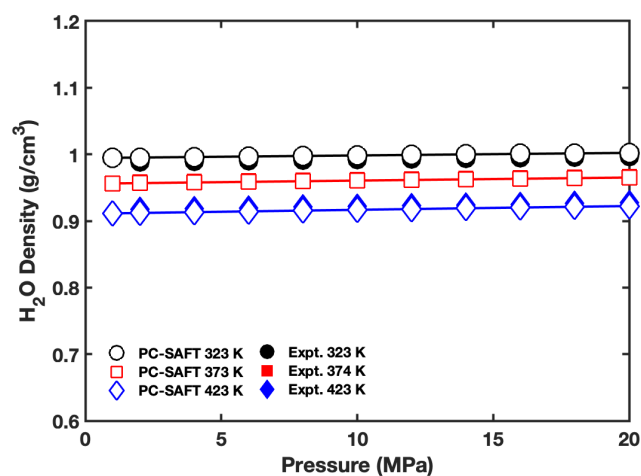

**Figure S1:** Densities of H<sub>2</sub>O as a function of pressure at different temperatures. The experimental data from NIST (<http://webbook.nist.gov/chemistry/fluid>) are shown as solid symbols.

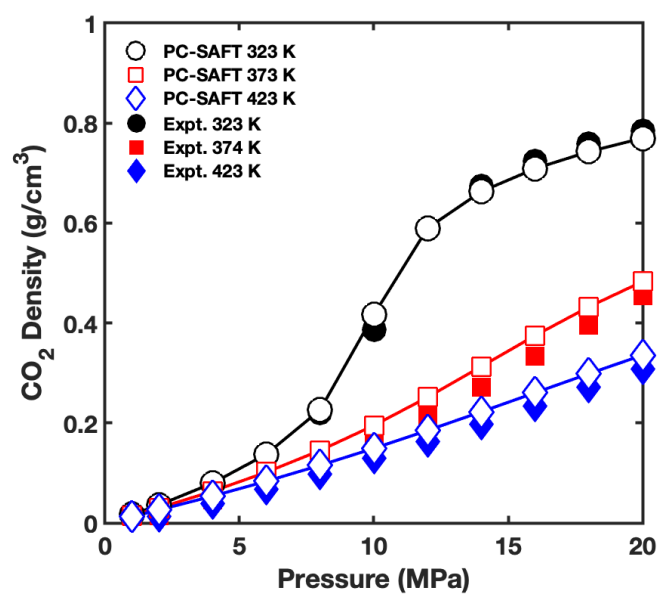

**Figure S2:** Densities of CO<sub>2</sub> as a function of pressure at different temperatures. The experimental data from NIST (<http://webbook.nist.gov/chemistry/fluid>) are shown as solid symbols.

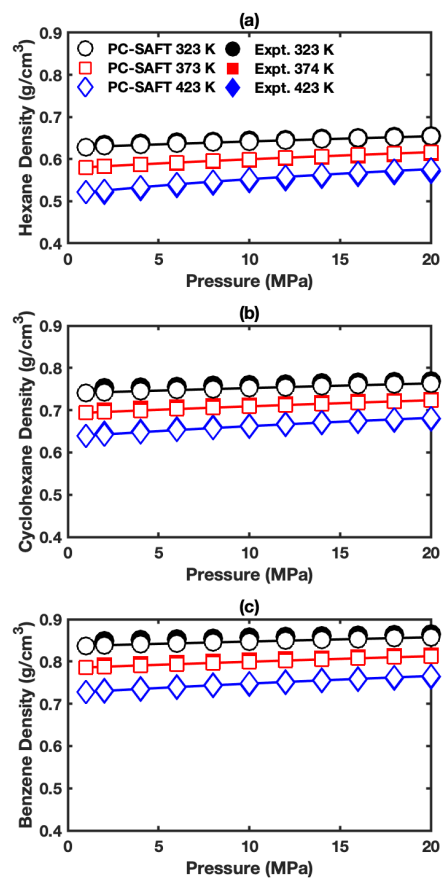

**Figure S3:** Densities of oil as a function of pressure at different temperatures. The experimental data from NIST (<http://webbook.nist.gov/chemistry/fluid>) are shown as solid symbols.

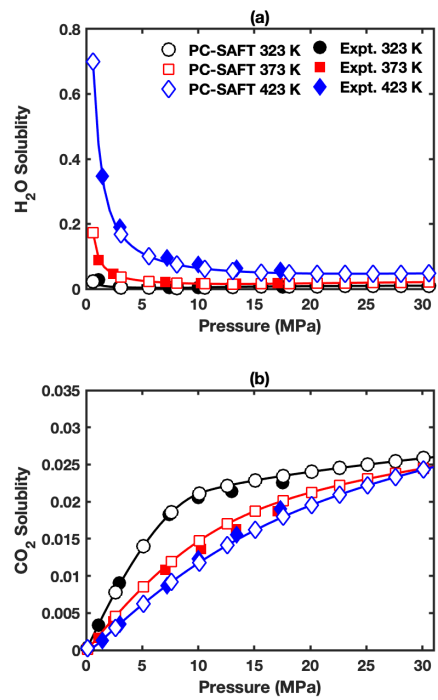

**Figure S4:** Solubilities in  $\text{H}_2\text{O}+\text{CO}_2$  two-phase system. The experimental data is taken from (J. Supercrit. Fluids, 2013, 73: 87-96).

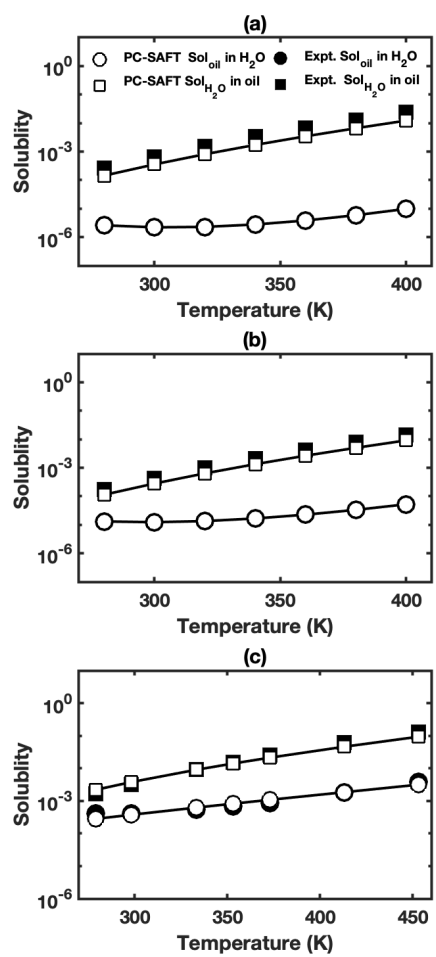

**Figure S5:** Solubilities in  $H_2O$ +oil two-phase system. The experimental data is taken from (J. Phys. Chem. Ref. Data, 2004, 33(2): 549-577) and (J. Chem. Eng. Data, 2003, 48(3): 750-752).

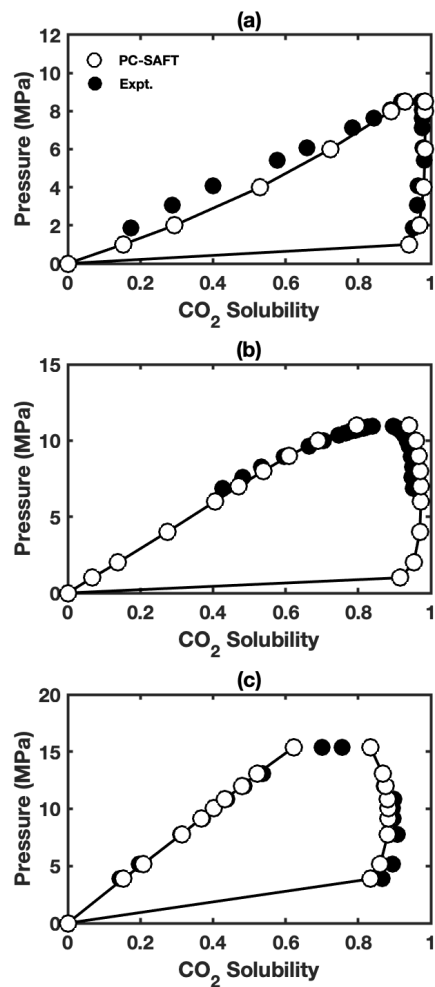

**Figure S6:** Solubilities in oil+CO<sub>2</sub> two-phase system. The experimental data is taken from (Fluid Phase Equilib., 1987, 33(1-2): 109-123), (J. Chem. Eng. Data, 1987, 32(3): 369-371), and (Fluid Phase Equilib., 1987, 36: 107-119).

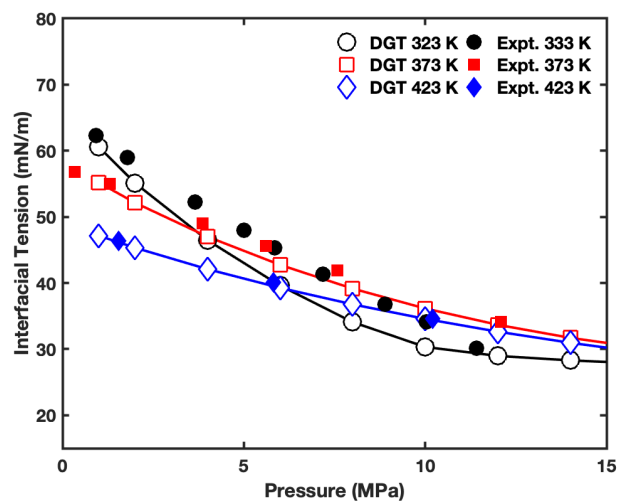

**Figure S7:** Pressure dependence of IFT in water-CO<sub>2</sub> two-phase system. The experimental data (J. Chem. Thermodyn., 2016, 93: 404) are shown as solid symbols.



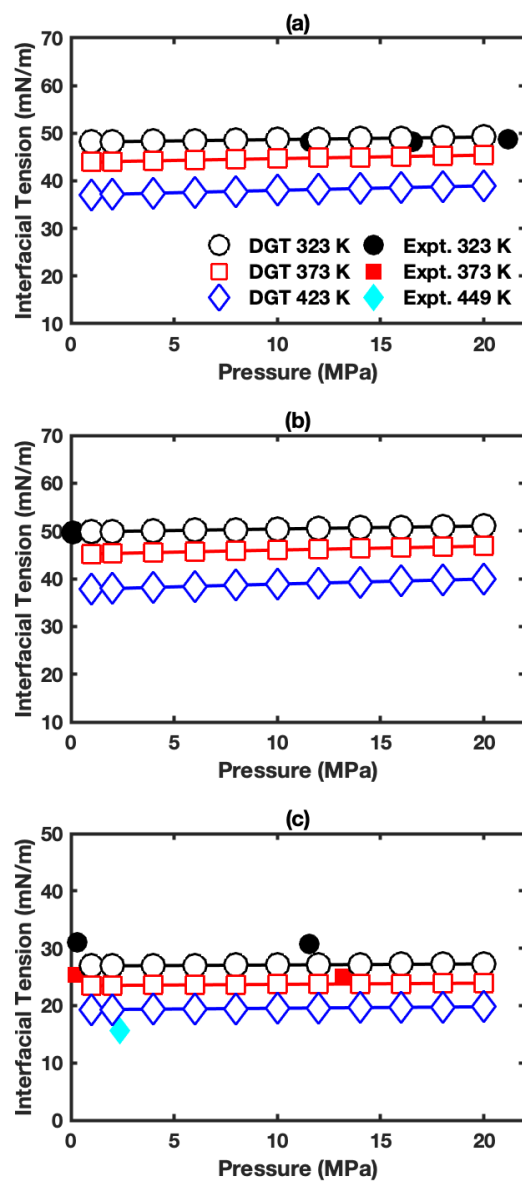

**Figure S8:** Pressure dependence of IFT in water+oil two-phase systems: (a) hexane; (b) cyclohexane; (c) benzene. The experimental data (J. Chem. Eng. Data, 1996, 41: 493; J. Phys. Chem., 1951, 55: 439; J. Colloid Interface Sci., 1967, 24: 323) are shown as solid symbols.

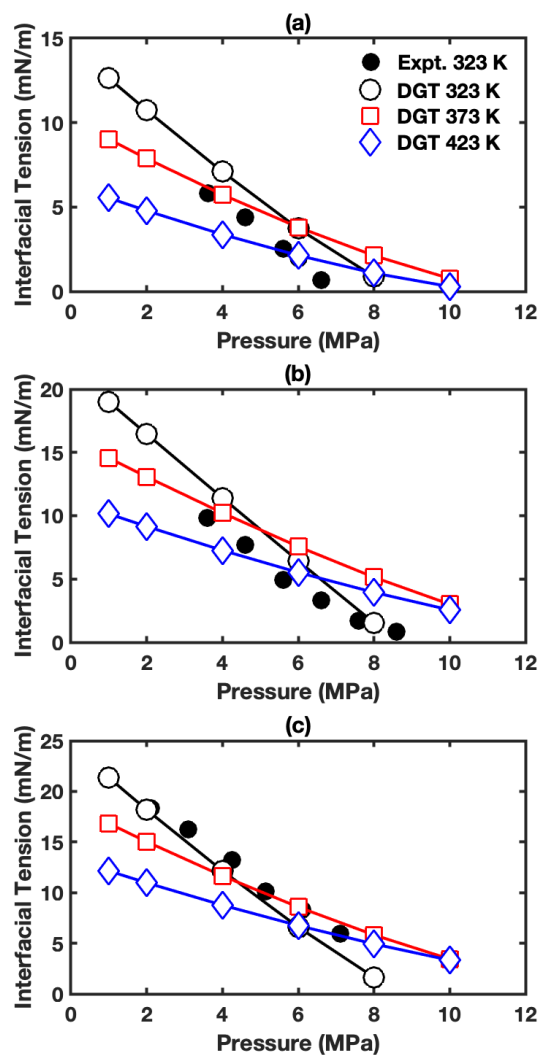

**Figure S9:** Pressure dependence of IFT in oil+methane two-phase systems: (a) hexane; (b) cyclohexane; (c) benzene. The experimental data (Chin. J. Chem. Eng., 2014, 22: 1302; J Supercrit Fluids, 2019, 154: 104625) are shown as solid symbols.

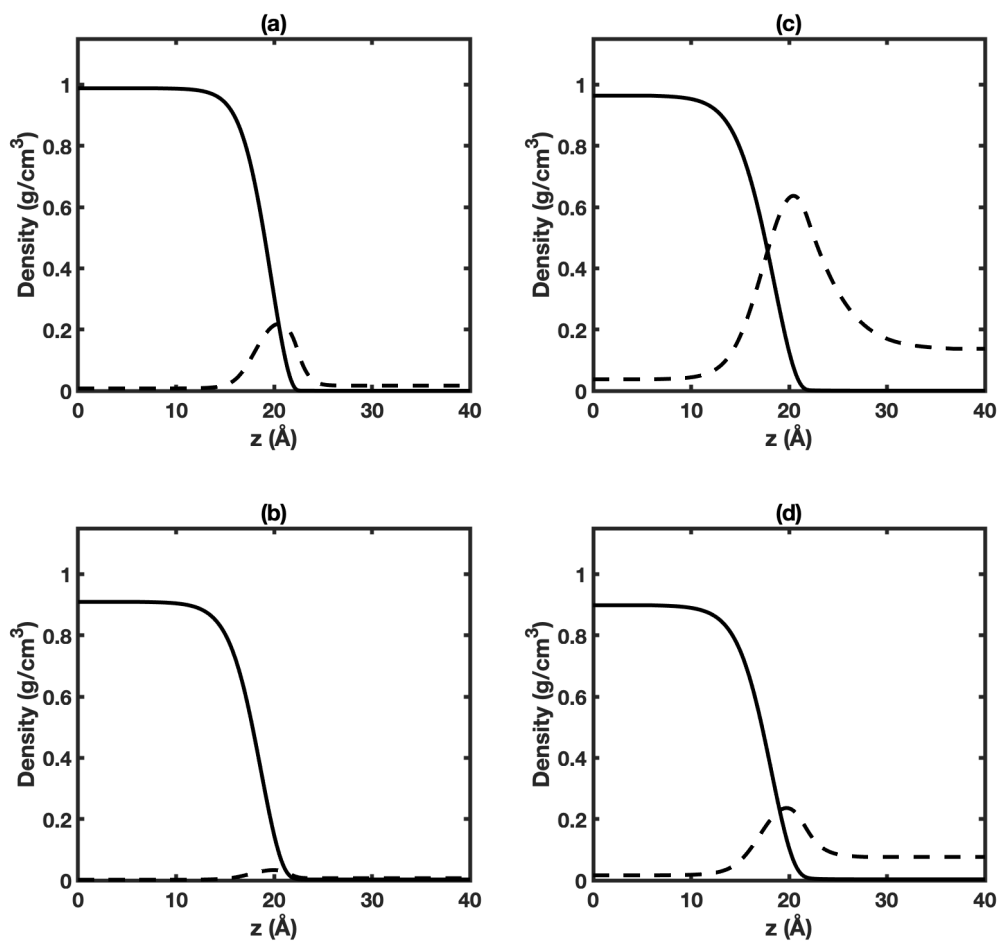

**Figure S10:** Equilibrium distributions of different species in water+CO<sub>2</sub> two-phase system at (a) 323 K and 1 MPa, (b) 423 K and 1 MPa, (c) 323 K and 6 MPa, and (d) 423 K and 6 MPa. The solid and dashed lines denote water and CO<sub>2</sub>, respectively.

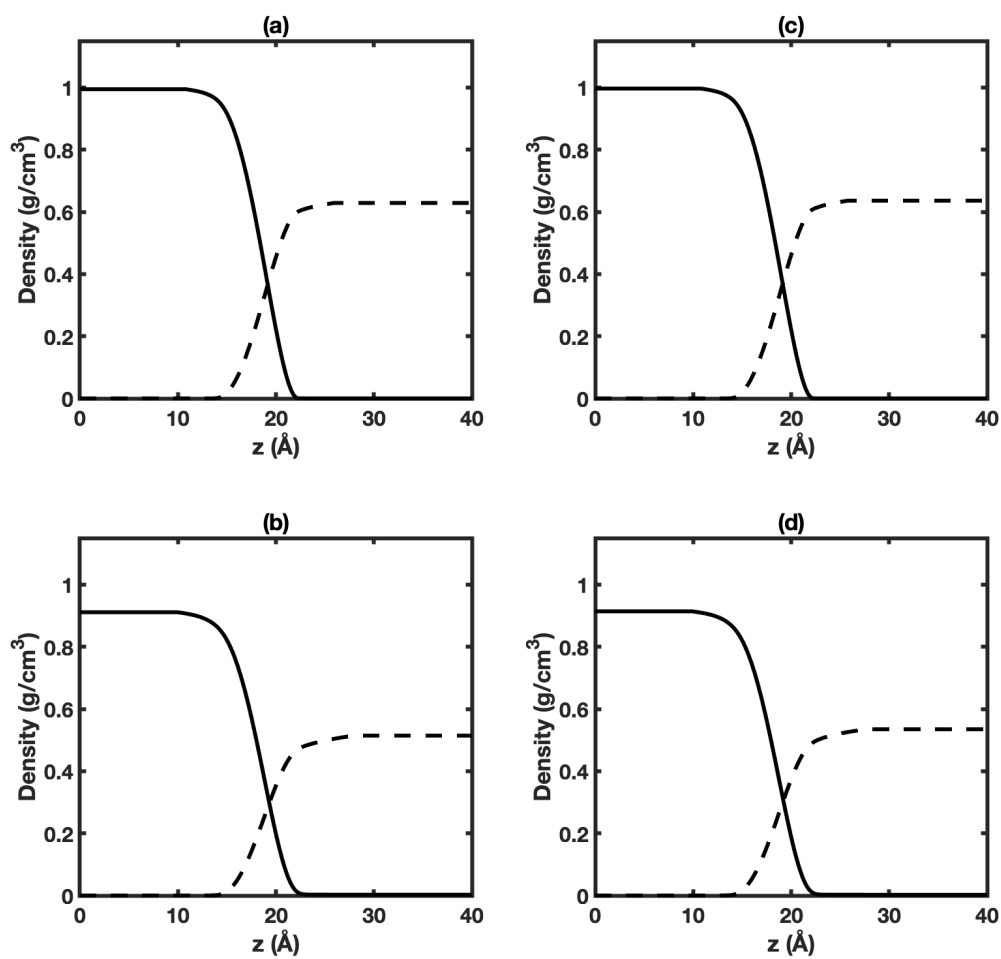

**Figure S11:** Equilibrium distributions of different species in hexane+water two-phase system at (a) 323 K and 1 MPa, (b) 423 K and 1 MPa, (c) 323 K and 6 MPa, and (d) 423 K and 6 MPa. The solid and dashed lines denote water and hexane, respectively.

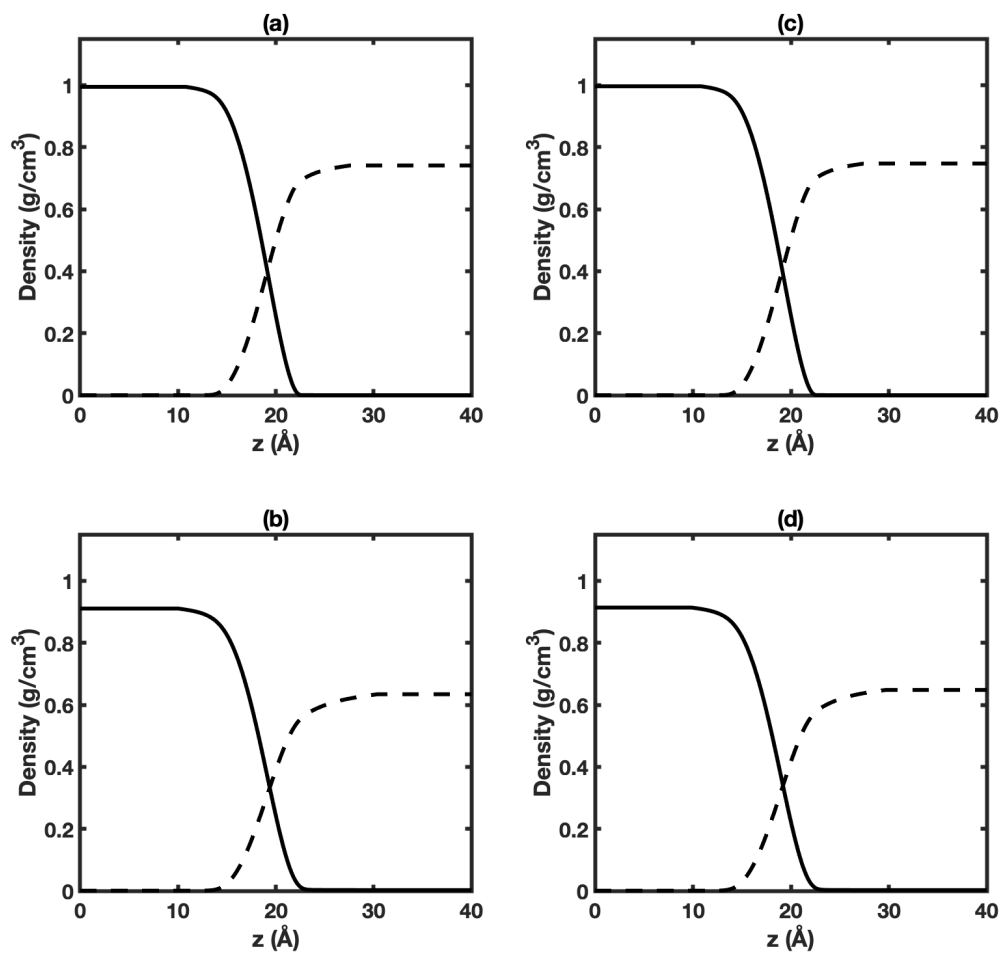

**Figure S12:** Equilibrium distributions of different species in cyclohexane+water two-phase system at (a) 323 K and 1 MPa, (b) 423 K and 1 MPa, (c) 323 K and 6 MPa, and (d) 423 K and 6 MPa. The solid and dashed lines denote water and cyclohexane, respectively.

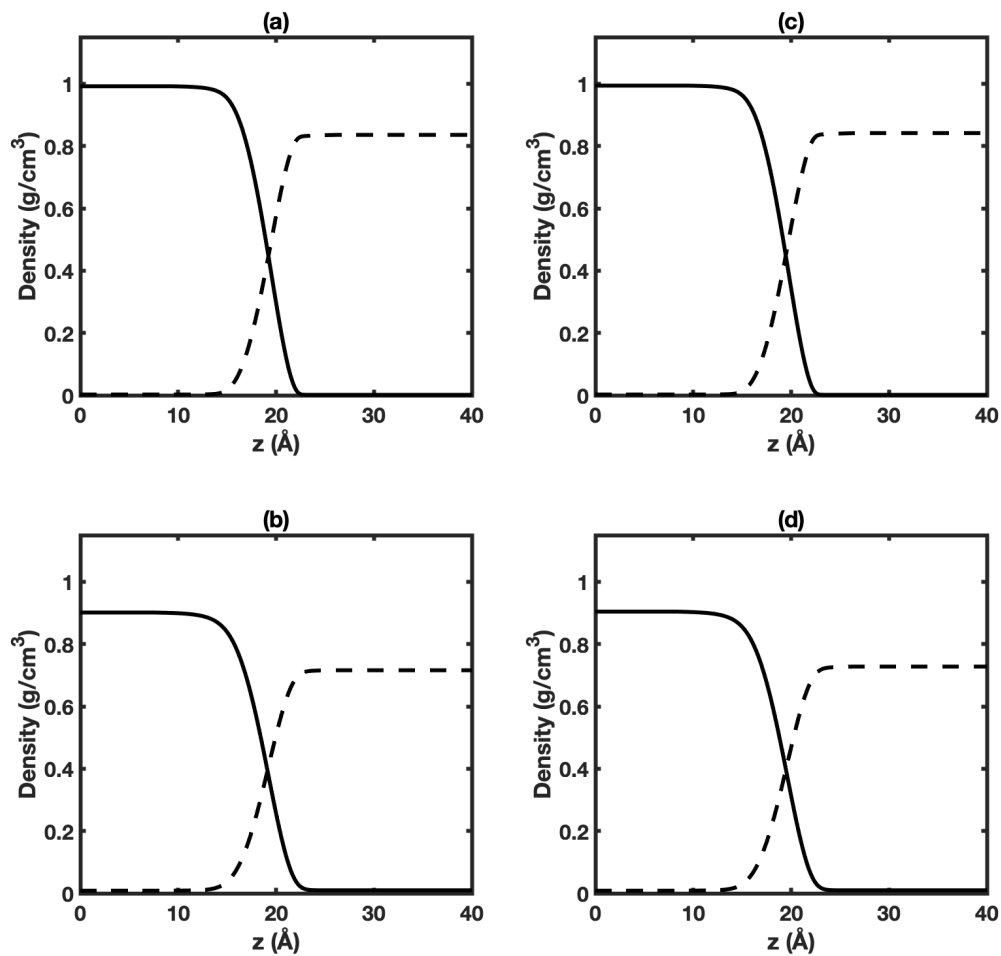

**Figure S13:** Equilibrium distributions of different species in benzene+water two-phase system at (a) 323 K and 1 MPa, (b) 423 K and 1 MPa, (c) 323 K and 6 MPa, and (d) 423 K and 6 MPa. The solid and dashed lines denote water and benzene, respectively.

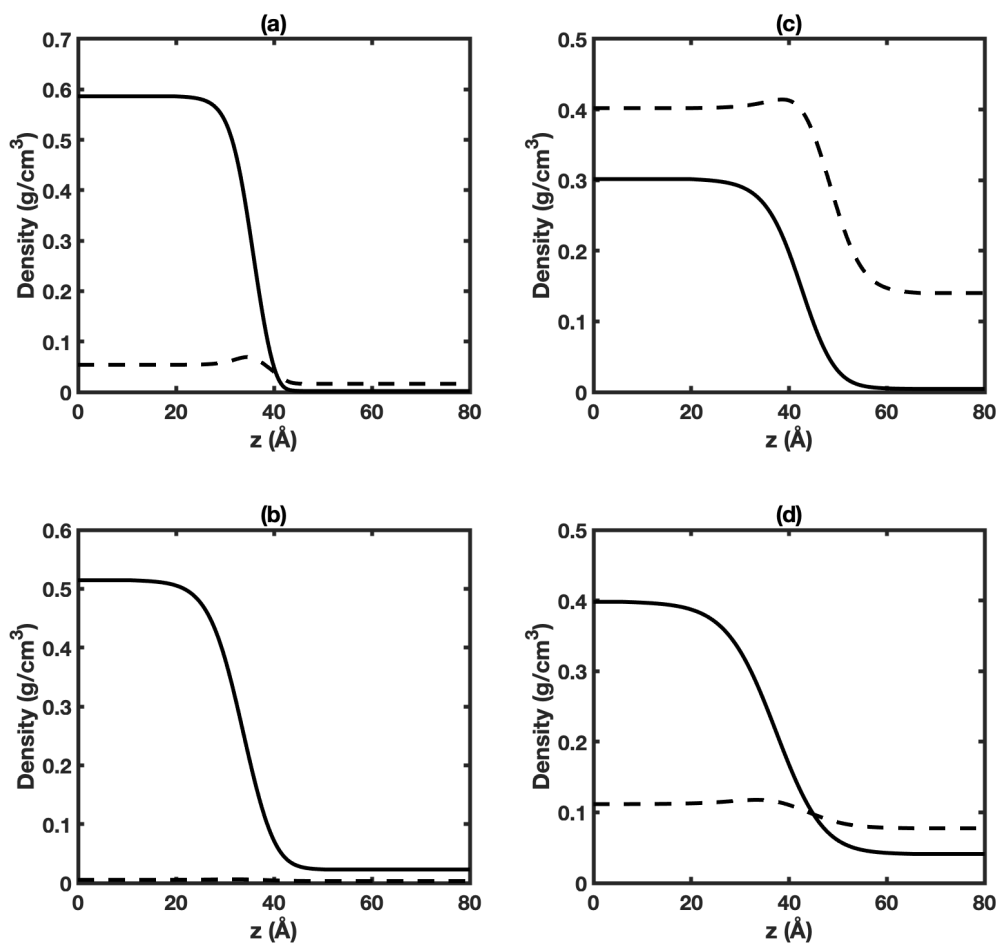

**Figure S14:** Equilibrium distributions of different species in hexane+CO<sub>2</sub> two-phase system at (a) 323 K and 1 MPa, (b) 423 K and 1 MPa, (c) 323 K and 6 MPa, and (d) 423 K and 6 MPa. The solid and dashed lines denote hexane and CO<sub>2</sub>, respectively.

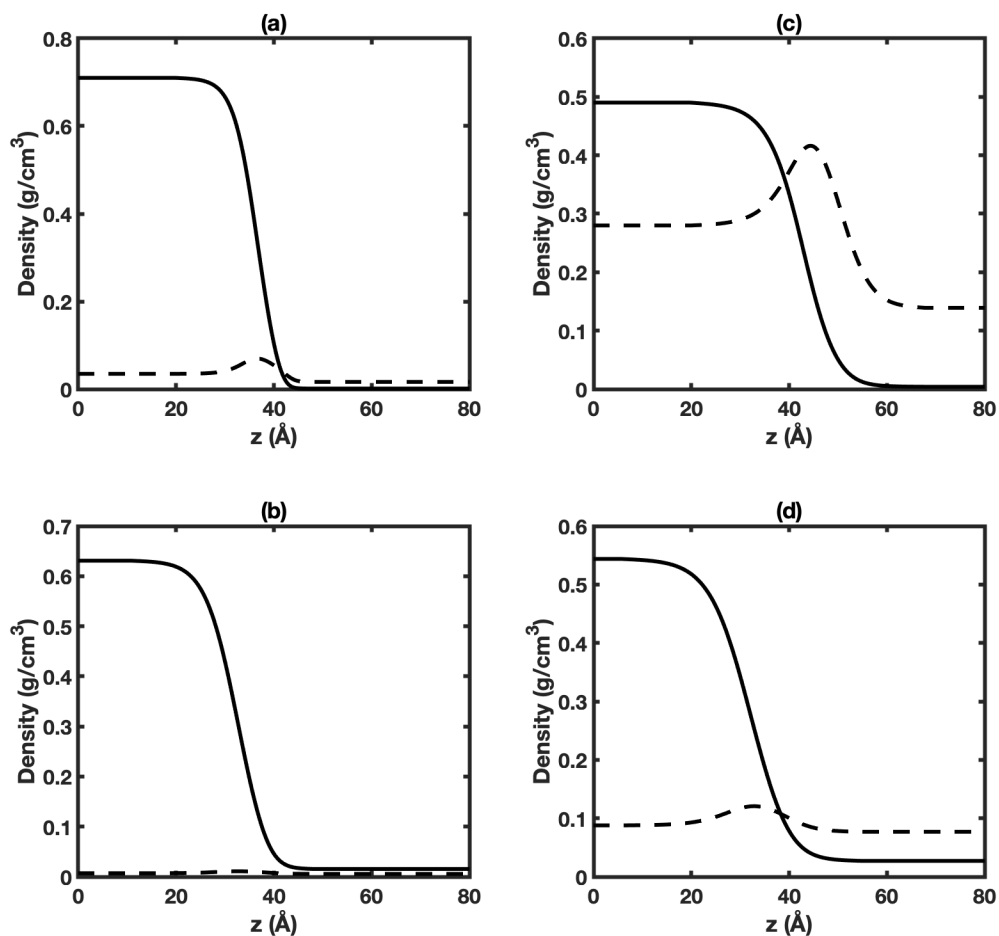

**Figure S15:** Equilibrium distributions of different species in cyclohexane+CO<sub>2</sub> two-phase system at (a) 323 K and 1 MPa, (b) 423 K and 1 MPa, (c) 323 K and 6 MPa, and (d) 423 K and 6 MPa. The solid and dashed lines denote cyclohexane and CO<sub>2</sub>, respectively.



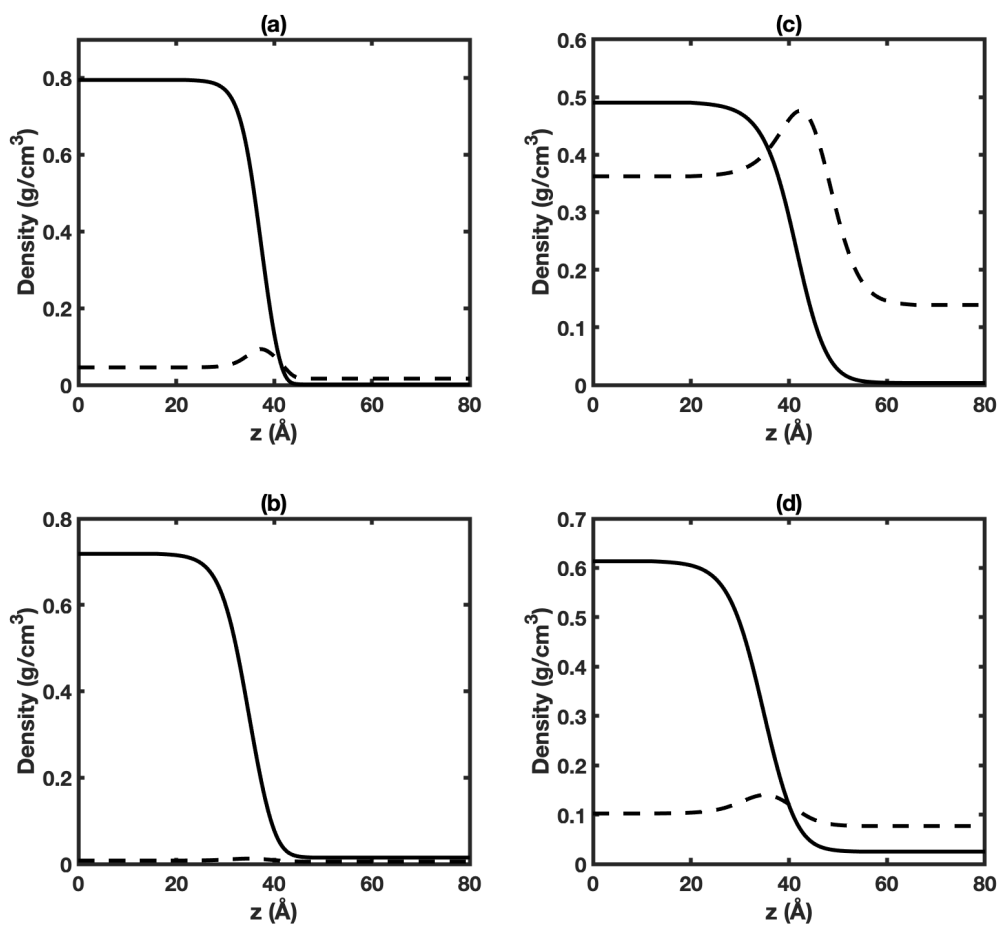

**Figure S16:** Equilibrium distributions of different species in benzene+CO<sub>2</sub> two-phase system at (a) 323 K and 1 MPa, (b) 423 K and 1 MPa, (c) 323 K and 6 MPa, and (d) 423 K and 6 MPa. The solid and dashed lines denote benzene and CO<sub>2</sub>, respectively.

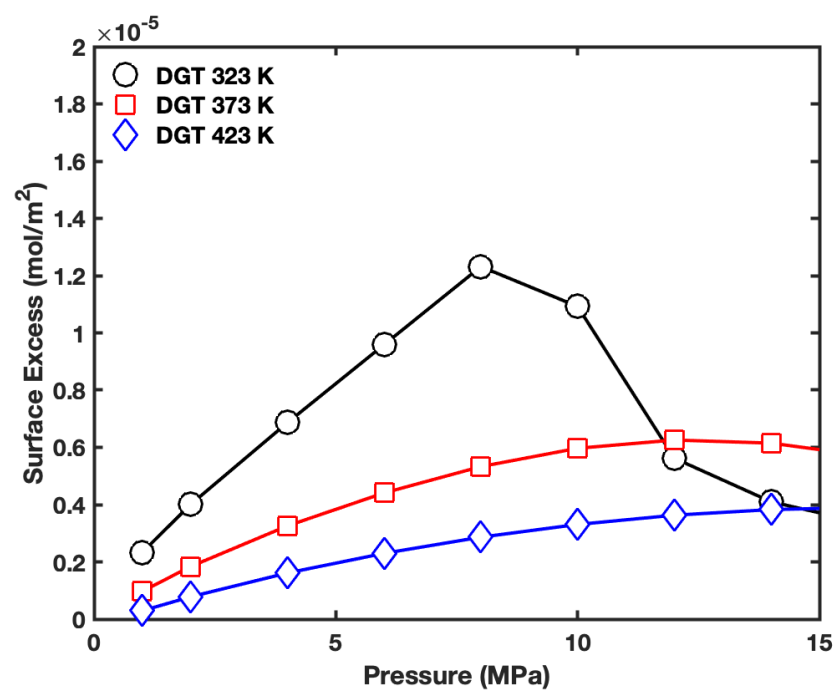

**Figure S17:** Pressure dependence of CO<sub>2</sub> surface excess in water+CO<sub>2</sub> two-phase system.

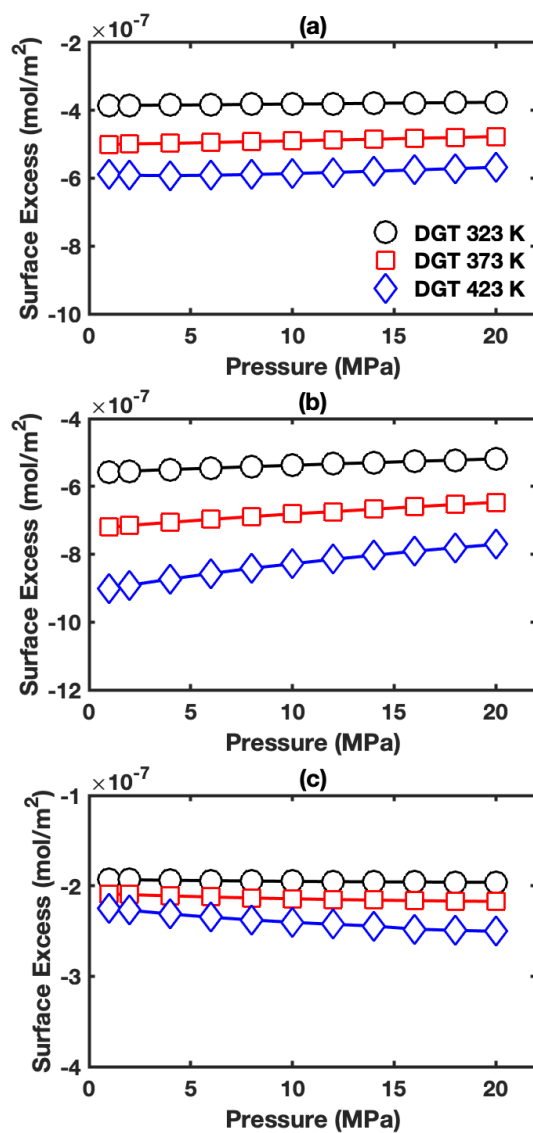

**Figure S18:** Pressure dependence of oil surface excess in water+oil two-phase systems: (a) hexane; (b) cyclohexane; (c) benzene.

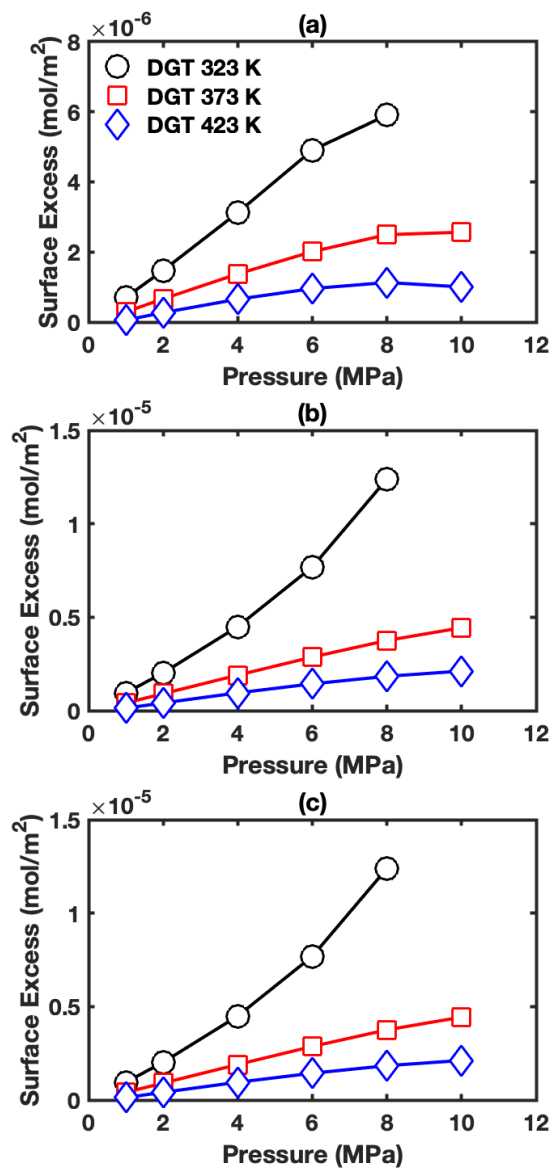

**Figure S19:** Pressure dependence of CO<sub>2</sub> surface excess in oil+CO<sub>2</sub> two-phase systems: (a) hexane; (b) cyclohexane; (c) benzene.

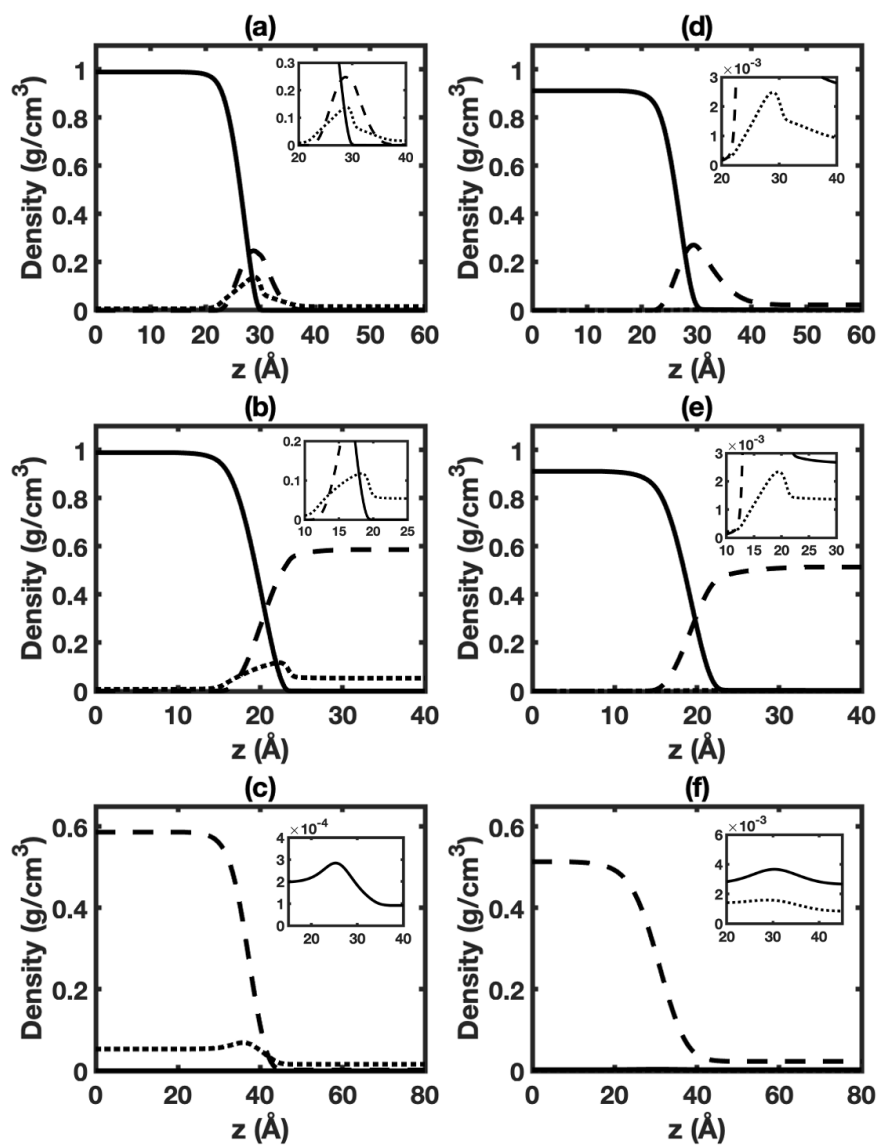

Figure S20: Same as Fig. 3, but at 1 MPa.

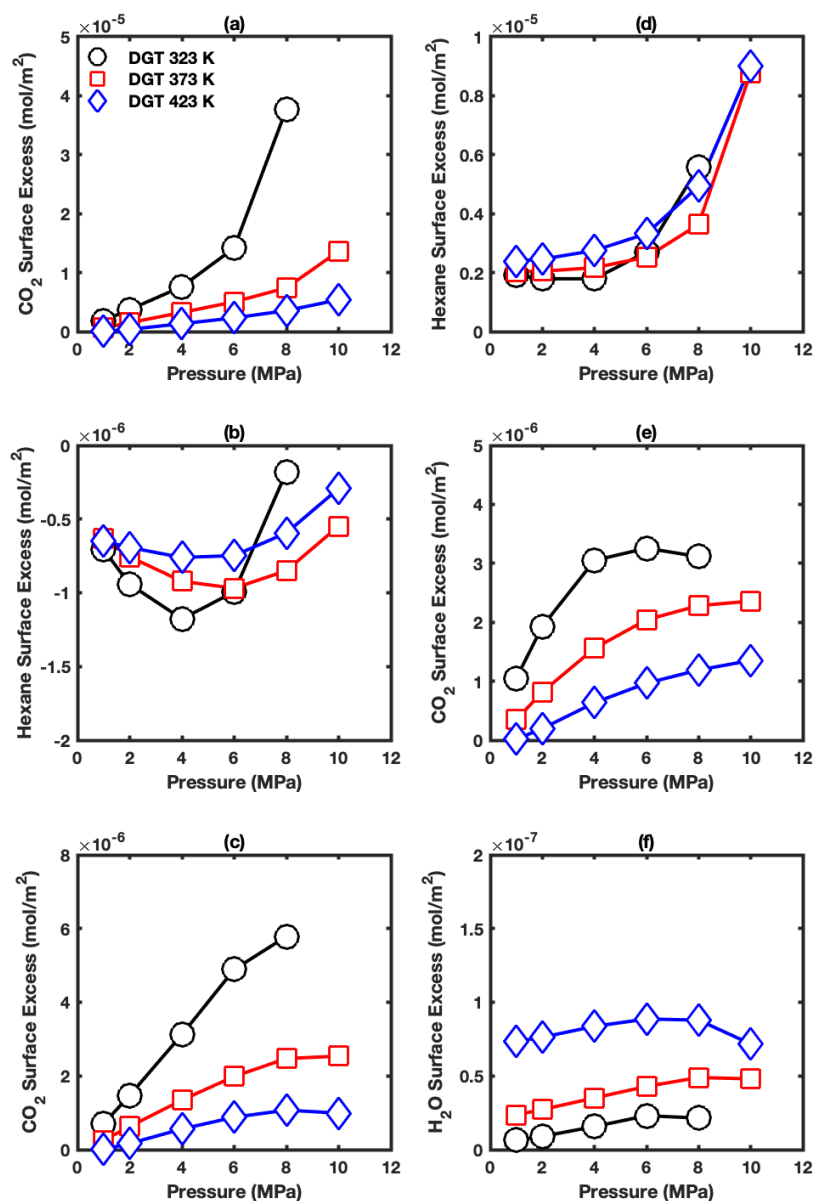

**Figure S21:** Pressure dependence of component surface excess in  $\text{H}_2\text{O}+\text{CO}_2+\text{hexane}$  three-phase system: (a,d) interface of aqueous phase +vapor phase (top panels); (b,e) interface of aqueous phase+hexane-rich phase (middle panels); (c,f) interface of hexane-rich phase+vapor phase (bottom panels).

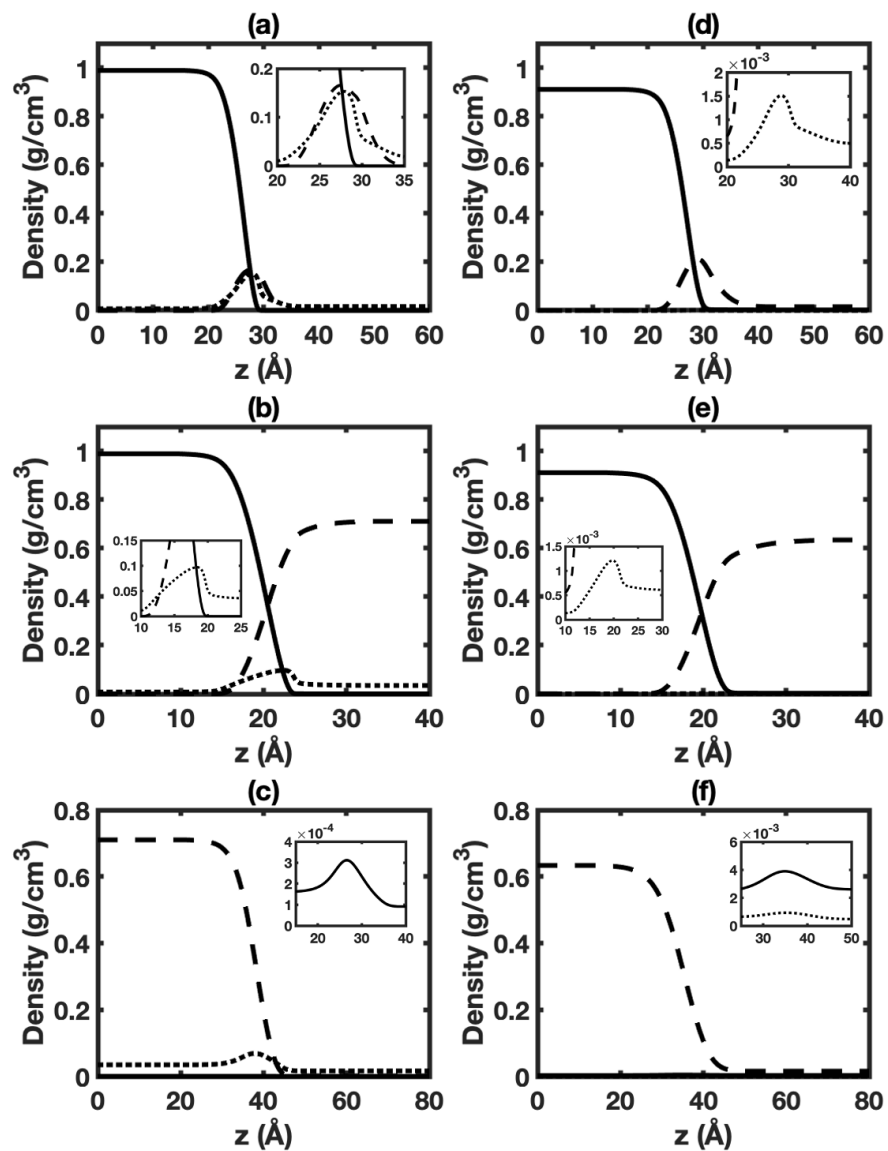

Figure S22: Same as Fig. 5, but at 1 MPa.

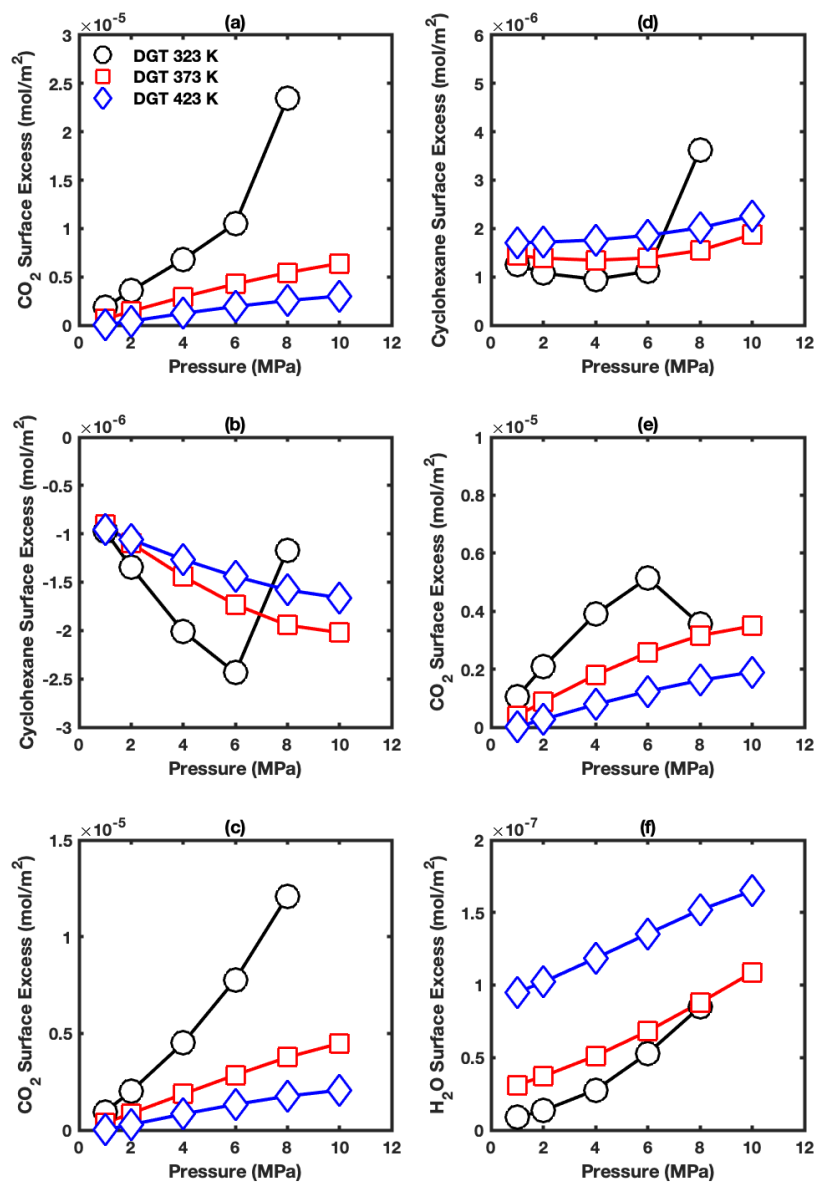

**Figure S23:** Pressure dependence of component surface excess in  $\text{H}_2\text{O}+\text{CO}_2+\text{cyclohexane}$  three-phase system: (a,d) interface of aqueous phase +vapor phase (top panels); (b,e) interface of aqueous phase+cyclohexane-rich phase (middle panels); (c,f) interface of cyclohexane-rich phase+vapor phase (bottom panels).



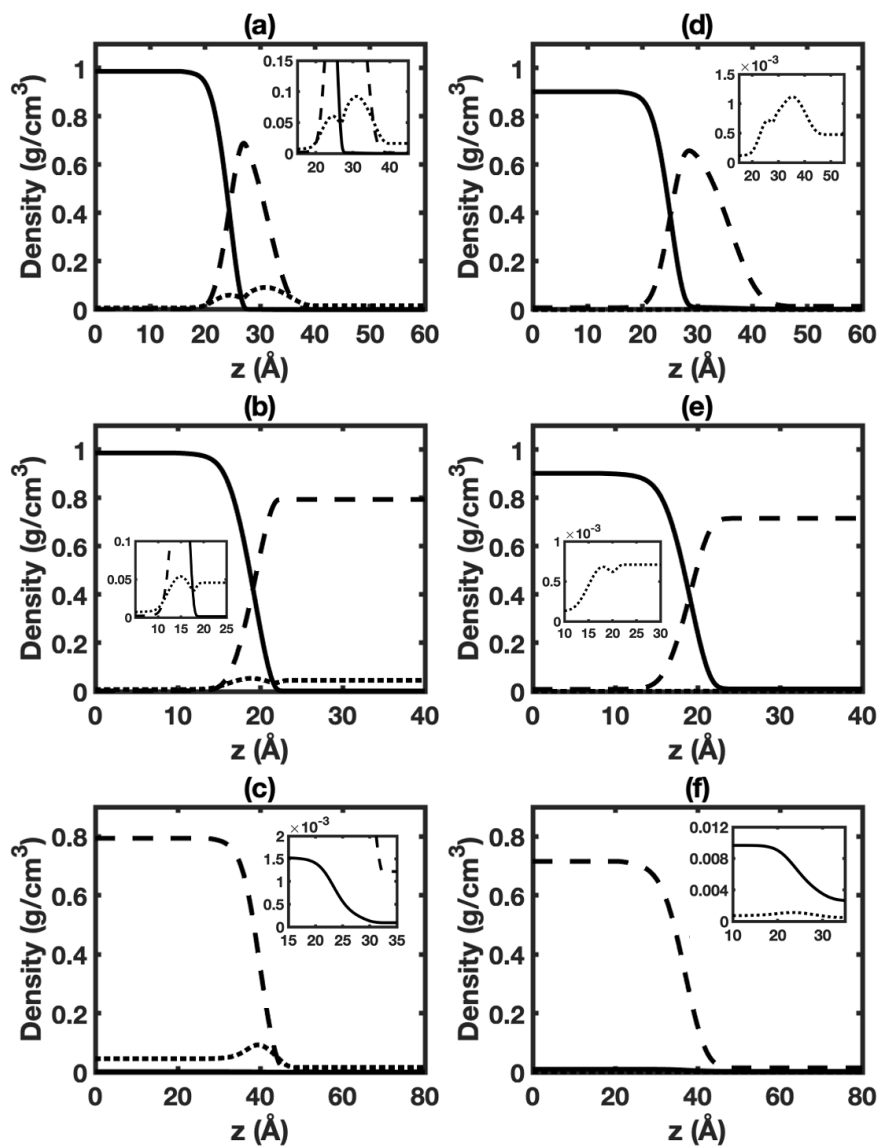

Figure S24: Same as Fig. 7, but at 1 MPa.

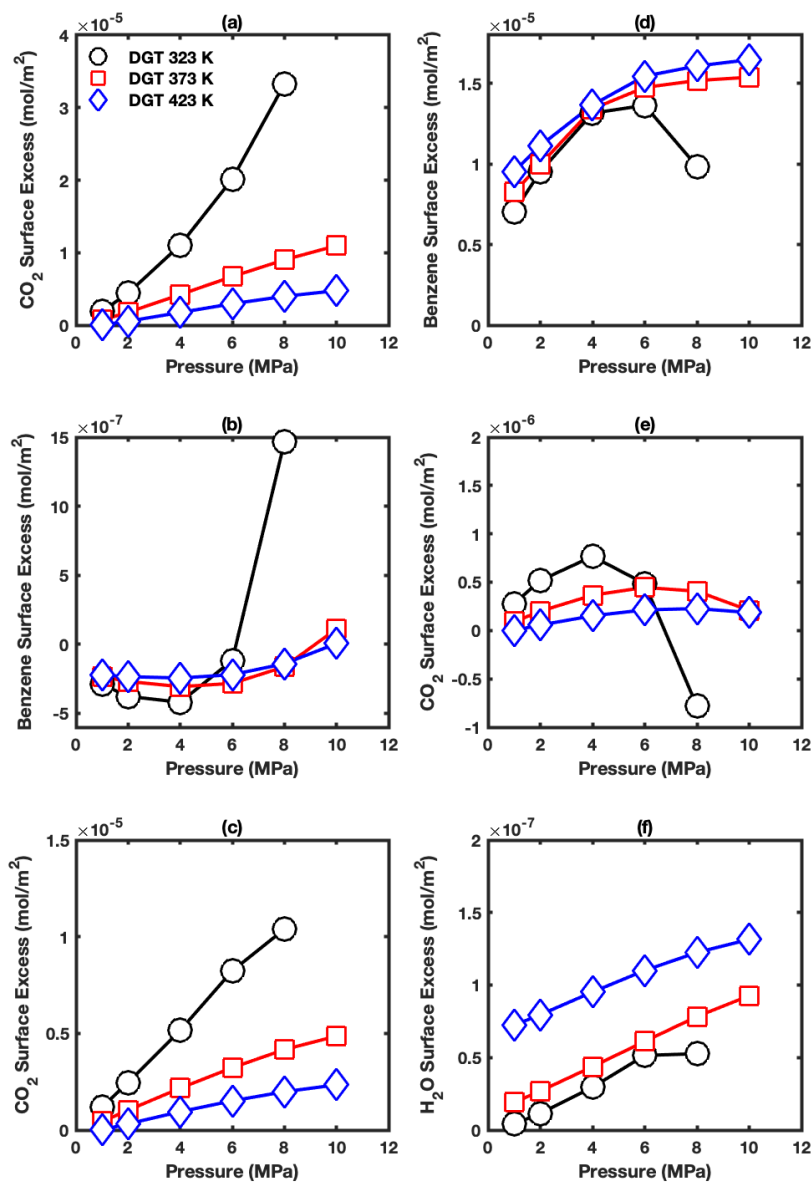

**Figure S25:** Pressure dependence of component surface excess in  $\text{H}_2\text{O}+\text{CO}_2+\text{benzene}$  three-phase system: (a,d) interface of aqueous phase +vapor phase (top panels); (b,e) interface of aqueous phase+benzene-rich phase (middle panels); (c,f) interface of benzene-rich phase+vapor phase (bottom panels).

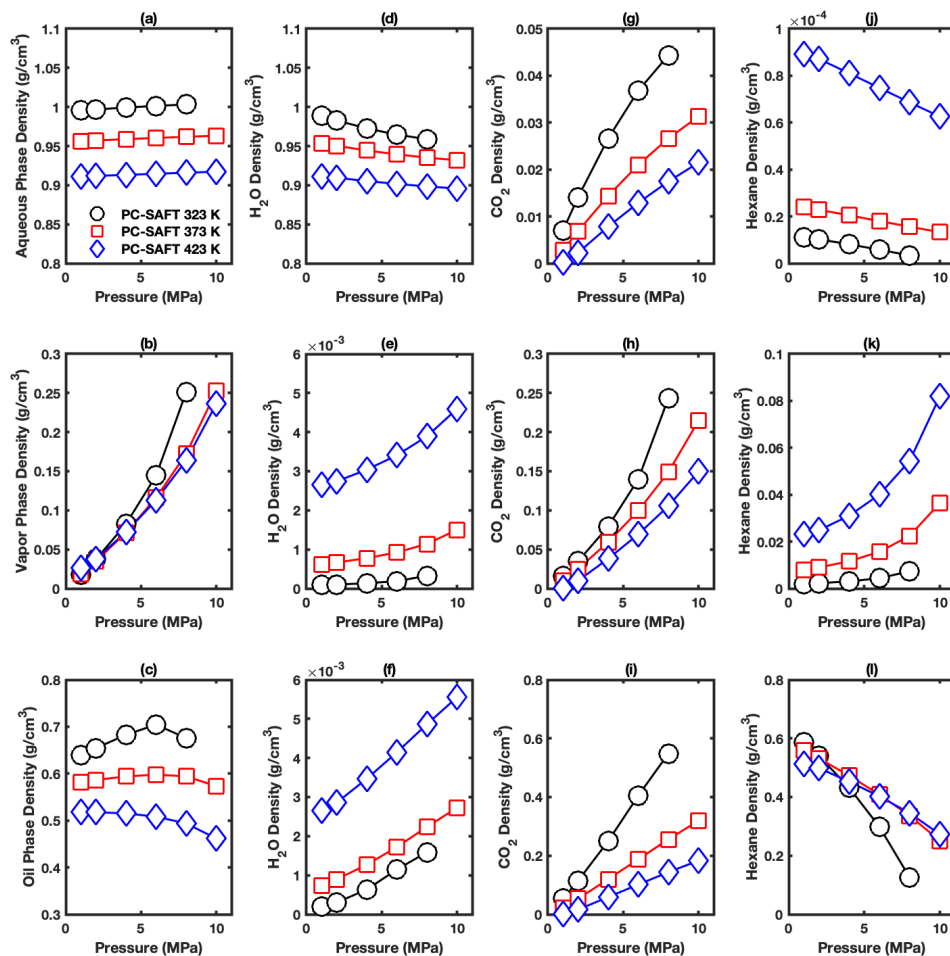

**Figure S26:** Densities in H<sub>2</sub>O+CO<sub>2</sub>+hexane three-phase system. Top panels give densities in aqueous phase. Middle panels give densities in vapor phase. Bottom panels give densities in oil phase.

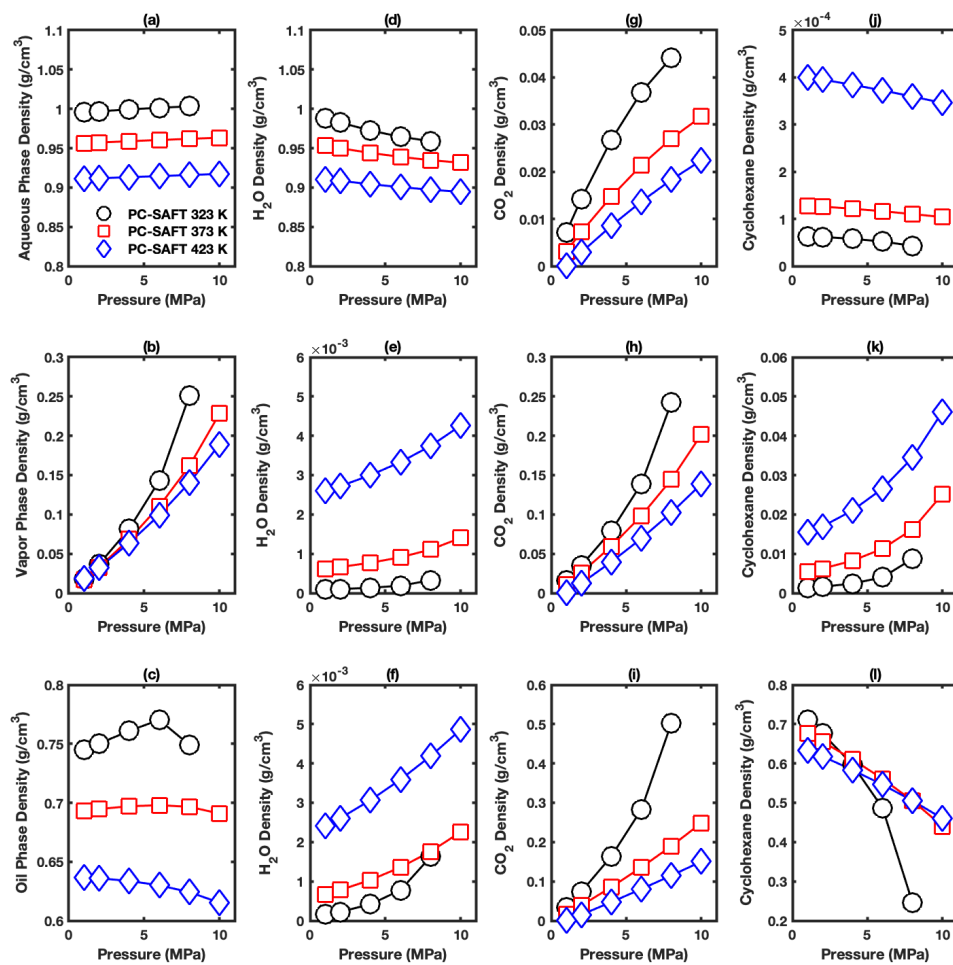

**Figure S27:** Densities in H<sub>2</sub>O+CO<sub>2</sub>+cyclohexane three-phase system. Top panels give densities in aqueous phase. Middle panels give densities in vapor phase. Bottom panels give densities in oil phase.

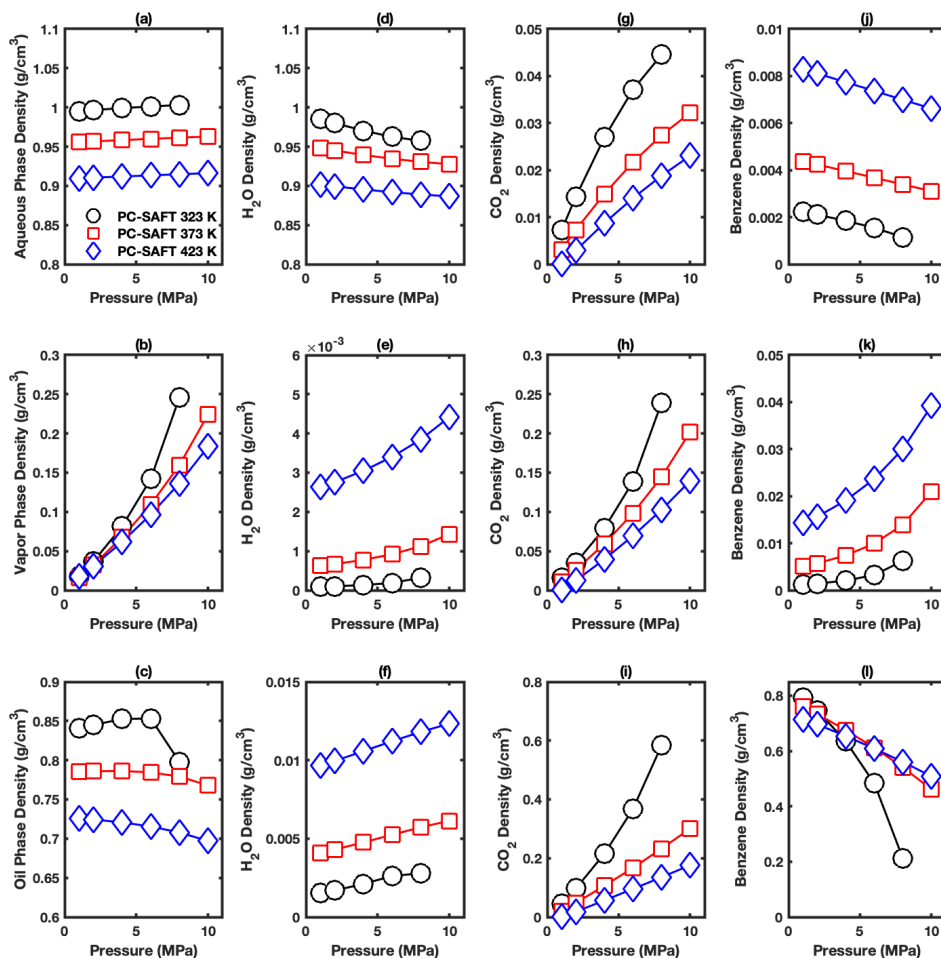

**Figure S28:** Densities in H<sub>2</sub>O+CO<sub>2</sub>+benzene three-phase system. Top panels give densities in aqueous phase. Middle panels give densities in vapor phase. Bottom panels give densities in oil phase.

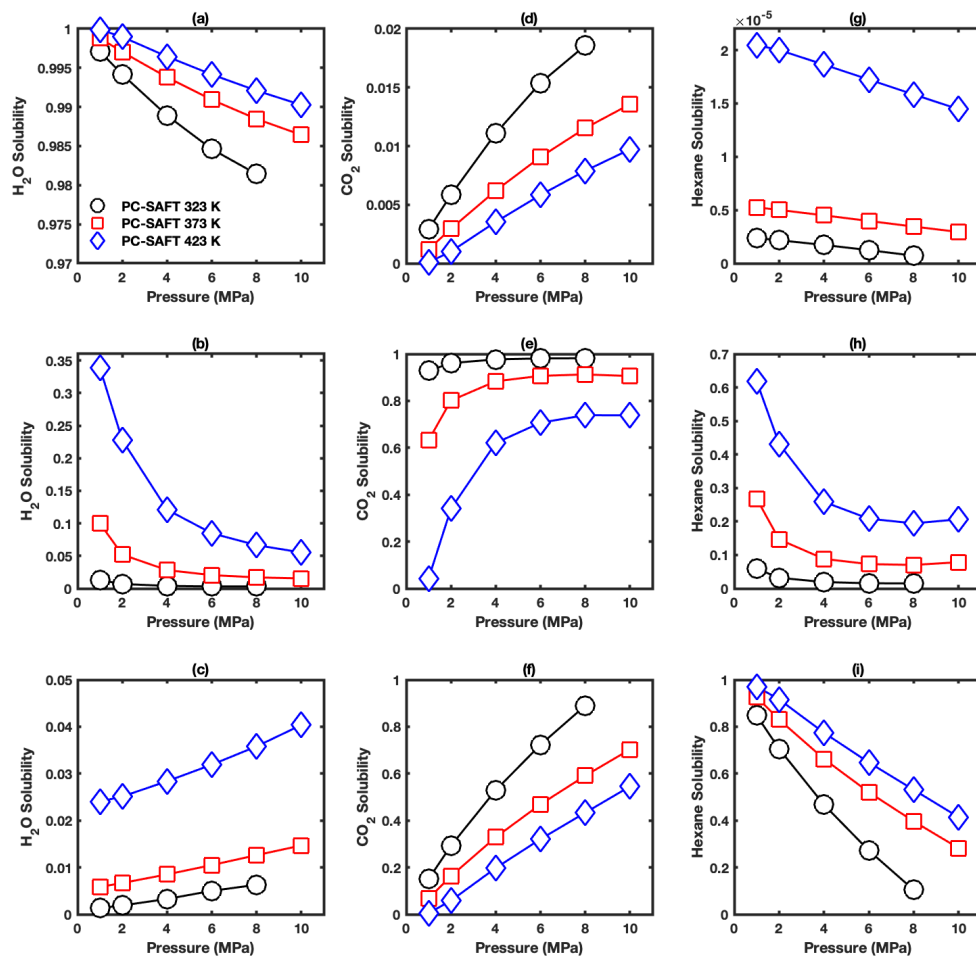

**Figure S29:** Solubilities in  $\text{H}_2\text{O}+\text{CO}_2+\text{hexane}$  three-phase system. Top panels give solubilities in aqueous phase. Middle panels give solubilities in vapor phase. Bottom panels give solubilities in oil phase.

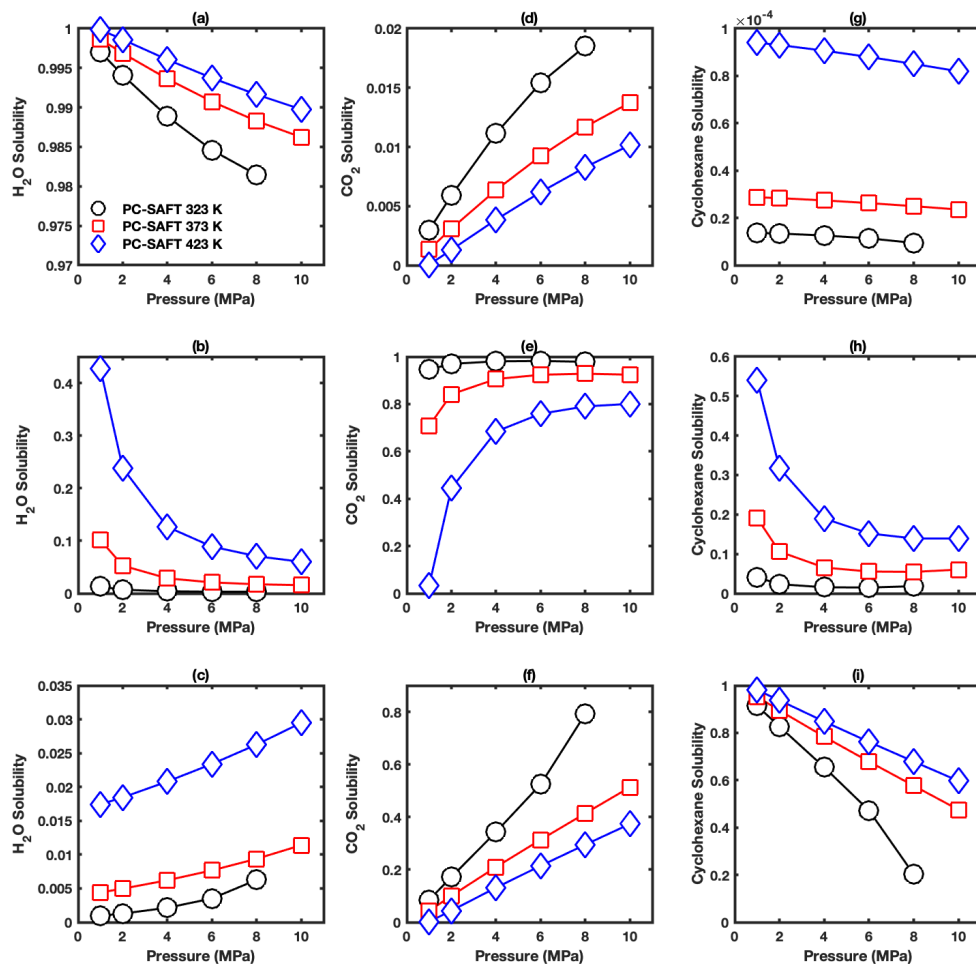

**Figure S30:** Solubilities in  $\text{H}_2\text{O}+\text{CO}_2+\text{cyclohexane}$  three-phase system. Top panels give solubilities in aqueous phase. Middle panels give solubilities in vapor phase. Bottom panels give solubilities in oil phase.

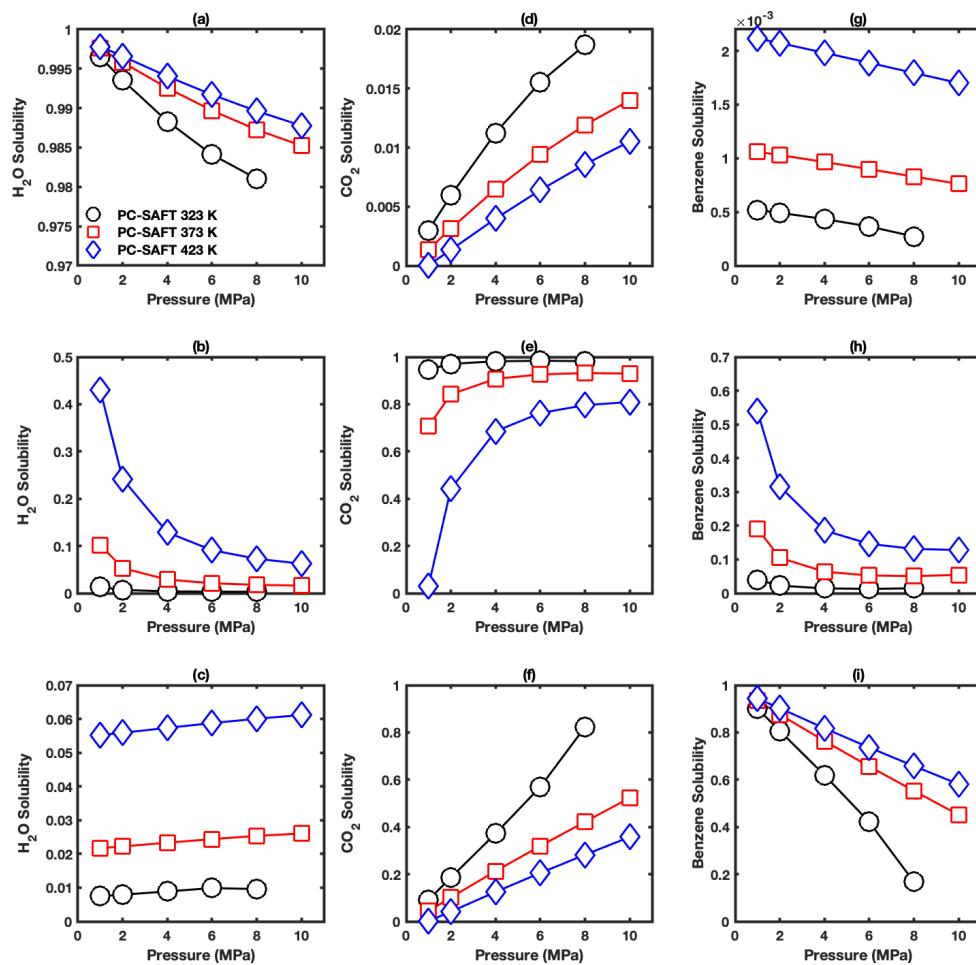

**Figure S31:** Solubilities in  $\text{H}_2\text{O}+\text{CO}_2+\text{benzene}$  three-phase system. Top panels give solubilities in aqueous phase. Middle panels give solubilities in vapor phase. Bottom panels give solubilities in oil phase.
