# Supplementary material for: Interfacial Properties of H2O+CO2+Oil Three-Phase Systems: A Density Gradient Theory Study
Source: MDPI journal article supplement (doi:10.3390/atmos13040625), 2022-04-14
Supplement: s1 [file s1]

Archive with 1 entries (1 files):
- atmosphere-1674105-supplementary.pdf
